# Supplementary material for: The roles of PTEN, cMET, and p16 in resistance to cetuximab in head and neck squamous cell carcinoma
Source: Springer Nature journal article supplement (doi:10.1007/s12032-018-1234-0), 2018-11-26
Supplement: MOESM4 [file 16295382]

| **Electronic supplementary material 4 - Univariate Cox Regression Analysis of Progression-free survival** | | |
| --- | --- | --- |
| **Characteristic** | **HR (95% CI)** | **p-value** |
| **Patient age** |  |  |
| ≤ 65 y | 1 | 0.035 |
| > 65 y | 0.63 (0.41–0.96) |  |
| **Gender** |  |  |
| Male | 1 | 0.446 |
| Female | 0.81 (0.48–1.37) |  |
| **Cetuximab use** |  |  |
| No | 1 | 0.157 |
| Yes | 0.73 (0.47–1.12) |  |
| **History of smoking** |  |  |
| No | 1 | 0.362 |
| Yes | 1.26 (0.76–2.08) |  |
| **ECOG performance status** |  |  |
| 0 | 1 | 0.347 |
| ≥ 1 | 1.23 (0.79–1.92) |  |
| **Oral** **cavity as primary tumor site** |  |  |
| No | 1 | 0.715 |
| Yes | 0.924 (0.60–1.41) |  |
| **Site of recurrence** |  |  |
| Locoregional | 1 | 0.307 |
| Distant | 1.24 (0.82–1.87) |  |
| **First**-**line** **cetuximab treatment** |  |  |
| No | 1 | 0.405 |
| Yes | 1.34 (0.67–2.70) |  |
| **Chemotherapy with platinum** |  |  |
| No | 1 | 0.357 |
| Yes | 1.22 (0.80–1.87) |  |
| **p16 expression** |  |  |
| Yes | 1 | 0.538 |
| No | 0.885 (0.60–1.30) |  |
| **Low PTEN expression** a |  |  |
| Yes | 1 | 0.022 |
| No | 1.80 (1.09–2.98) |  |
| **High cMET expression** b |  |  |
| Yes | 1 | 0.791 |
| No | 1.01 (0.66–1.71) |  |

HR: hazard ratio; CI: confidence interval.

a Low PTEN expression defined as an H-score ≤ 10.

b High cMET expression defined as an H-score > the median value for the cohort (H-score = 45).
